# Supplementary material for: Happy-Productive Teams and Work Units: A Systematic Review of the ‘Happy-Productive Worker Thesis’
Source: MDPI journal article supplement (doi:10.3390/ijerph17010069), 2019-12-20
Supplement: s1 [file s1]

## Systematic search – PsycINFO and PsycARTICLES

### **SATISFACTION:**

KW satisfaction AND KW ( performance or productiv\* or efficien\* or effective\* or "customer satisfaction" or "organizational citizenship behavior" or innov\* or creativ\* ) AND AB ( ( team\* or "work unit" or "work-unit" or "unit" or "units" or "workgroup" or "work group" ) AND AB ( empirical or data or sample or review or metanalysis or meta-analysis ) NOT AB ( students or athletes or sport or adolescents or children or disorder )

### **GROUP AFFECT:**

AB ("group affect\*" or "positive affect" or "group positive affect" or "positive emotions" or "team mood" or "group mood" or "positive mood") AND AB ( performance or productiv\* or efficien\* or effective\* or "customer satisfaction" or "organizational citizenship behavior" or innov\* or creativ\* ) AND AB ( team\* or "work unit" or "work-unit" or "unit-level" or "units" or "workgroup" or "work group" ) AND AB ( empirical or data or sample or review or metanalysis or meta-analysis ) NOT AB ( students or athletes or sport or adolescents or children or disorder)

### **ENGAGEMENT:**

KW engagement AND KW ( performance or productiv\* or efficien\* or effective\* or "customer satisfaction" or "organizational citizenship behavior" or innov\* or creativ\* ) AND AB ( team\* or "work unit" or "work-unit" or "unit-level" or "units" or "workgroup" or "work group" ) AND AB ( empirical or data or sample or review or metanalysis or meta-analysis ) NOT AB ( students or athletes or sport or adolescents or children or disorder )
